# Supplementary material for: Novel Biocompatible Polysaccharide-Based Eutectogels with Tunable Rheological, Thermal, and Mechanical Properties: The Role of Water
Source: Molecules. 2020 Jul 22;25(15):3314. doi: 10.3390/molecules25153314 (PMC7435784; doi:10.3390/molecules25153314)
Supplement: Supplementary file 1 [file molecules-25-03314-s001.pdf]

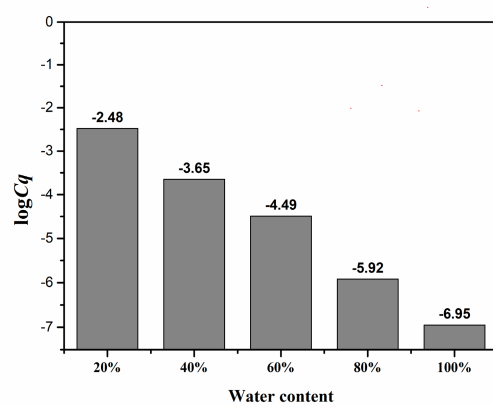

| Water content in<br>ChCl-Xyl (1:1) | 20%  | 40%  | 60%                   | 80%                   | 100%                  |
|------------------------------------|------|------|-----------------------|-----------------------|-----------------------|
| Quercetin solubility<br>(mg/g)     | 2.13 | 0.22 | $3.25 \times 10^{-2}$ | $1.19 \times 10^{-3}$ | $1.12 \times 10^{-4}$ |

Figure S1. Solubility of quercetin in ChCl-Xyl with different water content at 25°C. The solubility of quercetin measured in weight fraction, Wq of quercetin.

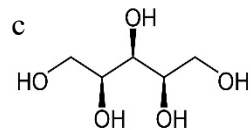

Figure.S2. Molecular structural formula of xanthan gum (a), choline chloride(b) and xylitol (c).
